# Supplementary material for: Effect of Bariatric Surgery on Survival and Hospitalizations in Patients with Severe Obesity. A Retrospective Cohort Study
Source: MDPI journal article supplement (doi:10.3390/nu13093150), 2021-09-09
Supplement: s1 [file s1]

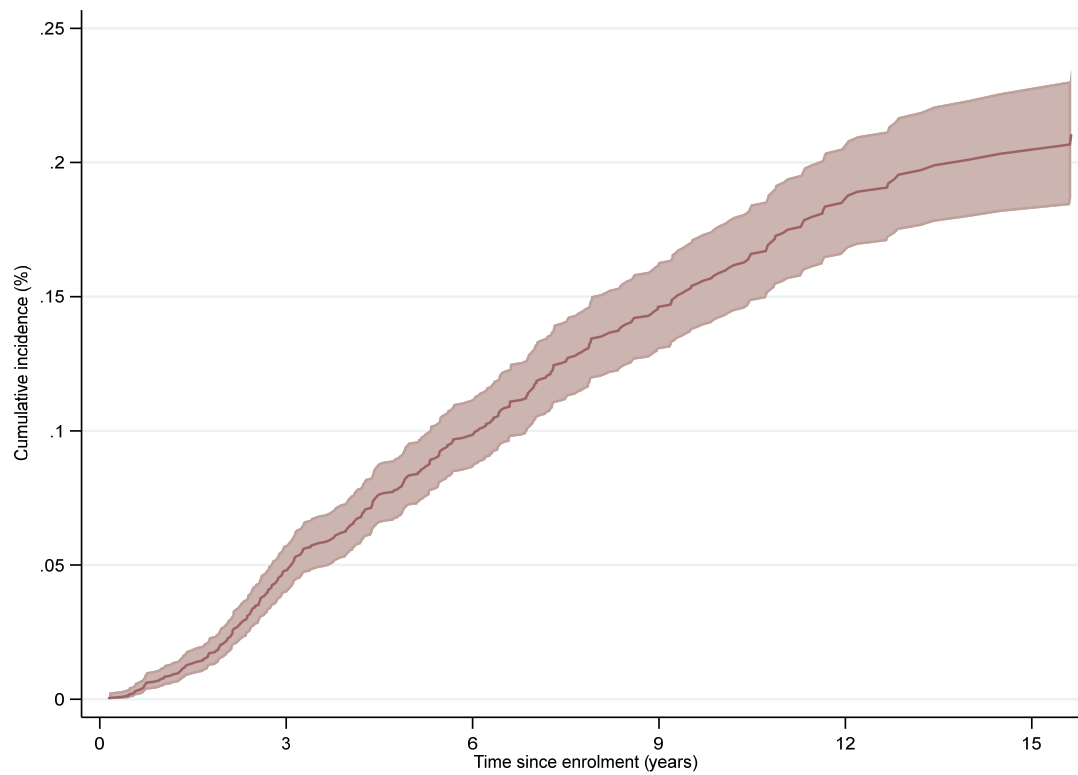

**Figure S1. Cumulative incidence of bariatric surgery (with 95% banding curves) in the whole cohort (considering mortality as competitive risk).**

**Table S1. Socio-demographic and clinical predictors (SHR and 95% CI) of bariatric surgery (considering mortality as competitive risk).**

|                          |                           | Crude effect     |        | Adjusted effect  |        |
|--------------------------|---------------------------|------------------|--------|------------------|--------|
|                          |                           | SHR (95% CI)*    | p      | SHR (95% CI)*    | p      |
|                          |                           | N=2,285          |        | N = 2,218^       |        |
| Age (years)              |                           | 0.97 (0.96-0.98) | <0.001 | 0.97 (0.96-0.98) | <0.001 |
| Females                  |                           | 1.15 (0.91-1.45) | 0.252  | 1.17 (0.91-1.50) | 0.211  |
| Educational level        |                           |                  |        |                  |        |
|                          | Degree                    | 1                |        | 1                |        |
|                          | High school               | 0.96 (0.53-1.72) | 0.884  | 0.95 (0.51-1.74) | 0.856  |
|                          | Intermediate school       | 1.07 (0.60-1.89) | 0.819  | 1.12 (0.62-2.03) | 0.708  |
|                          | Elementary school or less | 0.46 (0.24-0.90) | 0.024  | 0.62 (0.31-1.25) | 0.183  |
| Smoking                  |                           |                  |        |                  |        |
|                          | no                        | 1                |        | 1                |        |
|                          | yes                       | 0.88 (0.68-1.13) | 0.323  | 0.81 (0.63-1.06) | 0.124  |
|                          | not defined               | 0.26 (0.12-0.58) | 0.001  | 0.27 (0.12-0.61) | 0.001  |
| Charlson Index           |                           |                  |        |                  |        |
|                          | 0                         | 1                |        | 1                |        |
|                          | 1                         | 0.67 (0.51-0.88) | 0.845  | 0.81 (0.60-1.09) | 0.165  |
|                          | ≥2                        | 0.71 (0.68-1.08) | 0.107  | 0.96 (0.58-1.58) | 0.866  |
| BMI (kg/m <sup>2</sup> ) |                           | 1.01 (1.00-1.02) | 0.073  | 1.01 (1.00-1.02) | 0.016  |
| Systolic blood pressure  |                           |                  |        |                  |        |
|                          | ≤140 mmHg                 | 1                |        | 1                |        |
|                          | >140mmHg                  | 0.77 (0.61-0.99) | 0.039  | 0.89 (0.70-1.15) | 0.356  |
| Fasting glucose          |                           |                  |        |                  |        |
|                          | <126 mg/dL                | 1                |        | 1                |        |
|                          | ≥126mg/dL                 | 0.67 (0.48-0.94) | 0.021  | 0.93 (0.62-1.39) | 0.384  |
| Total cholesterol        |                           |                  |        |                  |        |
|                          | 167-218 mg/dL**           | 1                |        | 1                |        |
|                          | ≤166 mg/dL)               | 0.97 (0.75-1.27) | 0.845  | 0.92 (0.70-1.20) | 0.545  |
|                          | ≥219 mg/dL)               | 0.91 (0.69-1.19) | 0.477  | 1.07 (0.80-1.43) | 0.657  |
| Triglycerides            |                           |                  |        |                  |        |
|                          | <150 mg/dL                | 1                |        | 1                |        |
|                          | ≥150 mg/dL                | 0.96 (0.77-1.20) | 0.734  | 1.07 (0.83-1.38) | 0.611  |

\*SHR= sub-distribution hazards ratio; CI=confidence interval; ^patients without missing values in covariates were included in the model, except for smoking, for which a separate category (not defined) was created, since 5.3% of smoking data were missing; \*\*Cholesterol Interquartile range

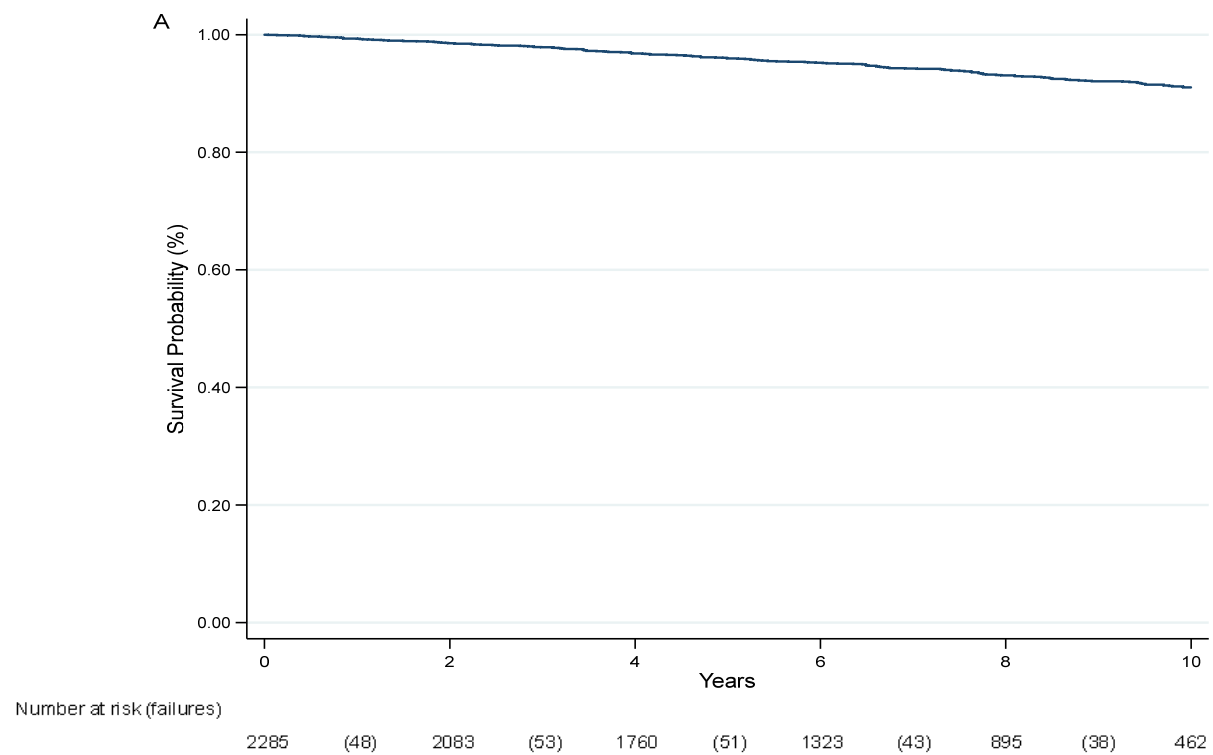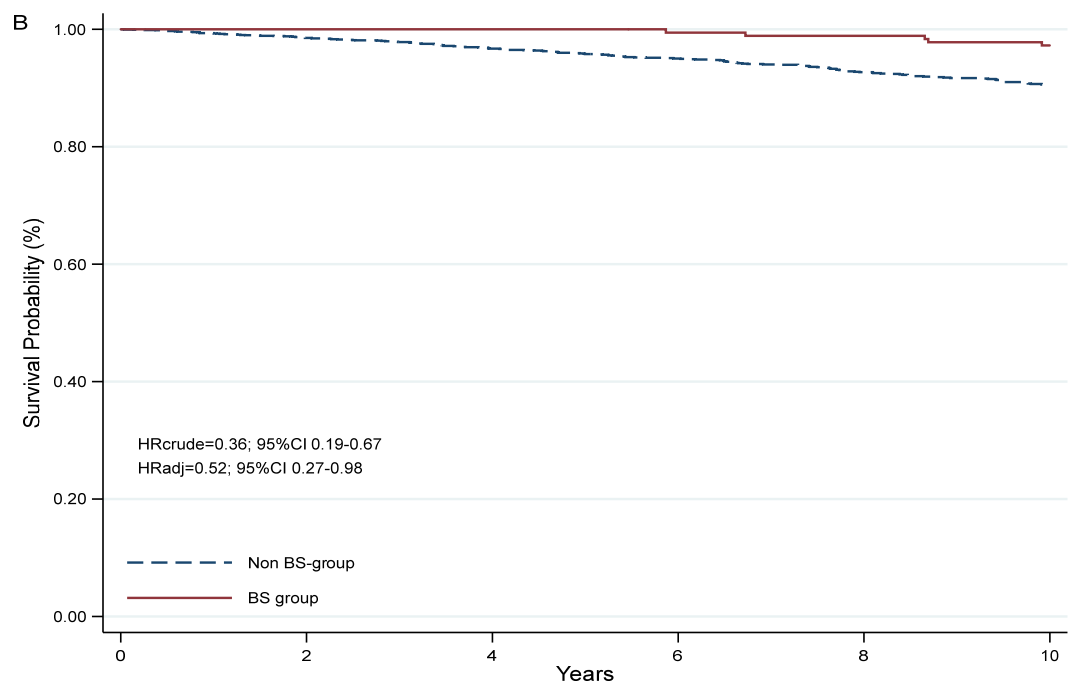

**Figure S2. Overall survival of the whole cohort (A) and by bariatric surgery (B) considered as time dependent variable .**
